# Supplementary material
Source: PubMed Central journal article supplement (PMC8823280)
Supplement: NIHMS1770528-supplement-2.pdf [file NIHMS1770528-supplement-2.pdf]

## ASSOCIATED CONTENT

### **SI** Supporting Information

The Supporting Information is available free of charge at <https://pubs.acs.org/doi/10.1021/acsnano.1c05871>.

Detailed descriptions of the DNA sequences used, FRET and molecular dynamics simulations, further supporting results in the form of tables and figures, and extended discussion of select assumptions, data, and simulations ([PDF](#))
